# Supplementary material for: Exploration on the Influence of Menstrual Cycle Phase on Biceps Brachii Tendon Mechanics
Source: Research Square preprint supplement (doi:10.21203/rs.3.rs-8321513/v1), 2025-12-19
Supplement: Supplementary file 1 [file c5d07b8c687b8a11d4e86f55.docx]

**Supplemental Table 1.** Bayesian linear mixed effects model output for dependent variables

|  | **Estimates** | **Mean** | **Standard Deviation** | **Credible Interval (2.5%, 97.5%)** | **Significant p-value**  **From LME Models** |
| --- | --- | --- | --- | --- | --- |
| **Tendon Elongation 0-20% MVC** | Intercept | 0.5 | 0.1 | (0.4, 0.7) |  |
|  | Follicular | -0.1 | 0.1 | (-0.2, 0.1) |  |
|  | **Luteal** | -0.2 | 0.1 | (-0.3, -0.1) | 3.0x10-4 |
| **Tendon Elongation 20-100% MVC** | Intercept | 0.6 | 0.1 | (0.4, 0.8) |  |
|  | Follicular | -0.1 | 0.1 | (-0.2, 0.1) |  |
|  | Luteal | 0.0 | 0.1 | (-0.1,0.1) |  |
| **Tendon Elongation 0-100% MVC** | Intercept | 1.1 | 0.1 | (1.0, 1.3) |  |
|  | Follicular | -0.1 | 0.1 | (-0.3, 0.0) |  |
|  | **Luteal** | -0.2 | 0.1 | (-0.4, -0.1) | 2.7x10-4 |
| **Hysteresis** | Intercept | 34.4 | 10.3 | (14.1, 54.1) |  |
|  | Follicular | -11.8 | 8.9 | (-29.6, 5.6) |  |
|  | Luteal | -2.4 | 8.6 | (-19.8, 13.7) |  |
| **Tendon Stiffness 0-20%** | Intercept | 38.2 | 10.8 | (17.0, 59.9) |  |
|  | Follicular | 6.9 | 8.4 | (-9.5, 23.9) |  |
|  | **Luteal** | 21.6 | 8.1 | (5.8, 37.9) | 0.009 |
| **Tendon Stiffness 20-100%** | Intercept | 101.5 | 15.9 | (70.2, 132.6) |  |
|  | Follicular | 24.8 | 15.0 | (-3.8, 53.6) |  |
|  | Luteal | 8.4 | 14.5 | (-19.2, 37.7) |  |
| **Tendon Strain** | Intercept | 5.6 | 1.0 | (3.6, 7.6) |  |
|  | Follicular | -0.9 | 0.9 | (-2.7, 1.0) |  |
|  | **Luteal** | -2.6 | 0.9 | (-4.4, -0.8) | 0.005 |
|  | **Force** | 1.8 | 0.2 | (1.5, 2.2) | 2.0x10-16 |
|  | Follicular*Force | -0.2 | 0.3 | (-0.7, 0.4) |  |
|  | Luteal*Force | -0.1 | 0.3 | (-0.6, 0.4) |  |
| **Tendon Stress** | Intercept | -0.2 | 2.7 | (-5.6, 5.2) |  |
|  | Follicular | 1.3 | 1.8 | (-2.2, 4.9) |  |
|  | Luteal | 0.0 | 1.7 | (-3.3, 3.4) |  |
|  | **Force** | 11.7 | 0.4 | (11.0, 12.4) | 2.0x 10-16 |
|  | **Follicular*Force** | -1.7 | 0.5 | (-2.8, -0.7) | 0.002 |
|  | **Luteal*Force** | -1.6 | 0.5 | (-2.7, -0.6) | 0.002 |

**Bolded estimates are credible and real change has occurred.**
